# Supplementary material for: Targeting brain metastases with ultrasmall theranostic nanoparticles, a first-in-human trial from an MRI perspective
Source: PubMed Central journal article supplement — Sci Adv. 2020 Jul 15;6(29):eaay5279. doi: 10.1126/sciadv.aay5279 (PMC7439298; doi:10.1126/sciadv.aay5279), 2020-07-15
Supplement: aay5279_SM.pdf [file aay5279_SM.pdf]

[advances.sciencemag.org/cgi/content/full/6/29/eaay5279/DC1](https://advances.sciencemag.org/cgi/content/full/6/29/eaay5279/DC1)

## Supplementary Materials for

### **Targeting brain metastases with ultrasmall theranostic nanoparticles, a first-in-human trial from an MRI perspective**

Camille Verry, Sandrine Dufort, Benjamin Lemasson, Sylvie Grand, Johan Pietras, Irène Tropès, Yannick Crémillieux\*,  
François Lux, Sébastien Mériaux, Benoit Larrat, Jacques Balosso, Géraldine Le Duc,  
Emmanuel L. Barbier, Olivier Tillement

\*Corresponding author. Email: [yannick.cremillieux@u-bordeaux.fr](mailto:yannick.cremillieux@u-bordeaux.fr)

Published 15 July 2020, *Sci. Adv.* **6**, eaay5279 (2020)

DOI: 10.1126/sciadv.aay5279

#### **This PDF file includes:**

Supplementary Materials and Methods  
Fig. S1

## Supplementary Materials

### *Supplementary materials and methods*

The main sequence parameters for i) the 3D T<sub>1</sub>-weighted gradient echo sequence and ii) the 3D FLASH sequence with multiple flip angles are the following:

3D T<sub>1</sub>-weighted gradient echo sequence: TR/TE=8.3 / 3.8ms, Flip Angle=8°, Field-of-view=256x256x220mm<sup>3</sup>, Acquisition matrix=256x256x220, Resolution=1x1x1mm<sup>3</sup>, duration=4min39s

3D FLASH sequence with multiple flip angles: TR/TE=8.1 / 3.8 ms, field-of-view=240x224x220mm<sup>3</sup>, Flip Angle=5°, Acquisition matrix=240x224, Resolution=1x1x2mm<sup>3</sup>, duration 2min51s. (repeated for Flip Angle=15, 20, and 35°)

The T<sub>1</sub> maps were obtained by fitting, pixel by pixel, the inversion recovery data with a 3-parameter, exponential recovery, model. The concentration of Gd<sup>3+</sup> was calculated using the relaxation time determined on the T<sub>1</sub> maps, according to the formula  $C = \frac{1}{r_1} \left( \frac{1}{T_{1post}} - \frac{1}{T_{1pre}} \right)$ , where T<sub>1pre</sub> is the relaxation time before AGuIX injection (in seconds), T<sub>1post</sub> is the relaxation time after nanoparticles injection (in seconds) and r<sub>1</sub> is the relaxivity (8.9 mM<sup>-1</sup>.s<sup>-1</sup>) per Gd<sup>3+</sup> in AGuIX nanoparticle at 3 Tesla.

The MRI enhancement SE (for Signal Enhancement) was defined as SE = (S<sub>post</sub>-S<sub>pre</sub>)/S<sub>pre</sub>, where S<sub>post</sub> and S<sub>pre</sub> correspond to the MRI signal amplitude measured post and pre administration of AGuIX nanoparticles using the 3D T<sub>1</sub>-weighted imaging sequence.

*Supplementary figures*

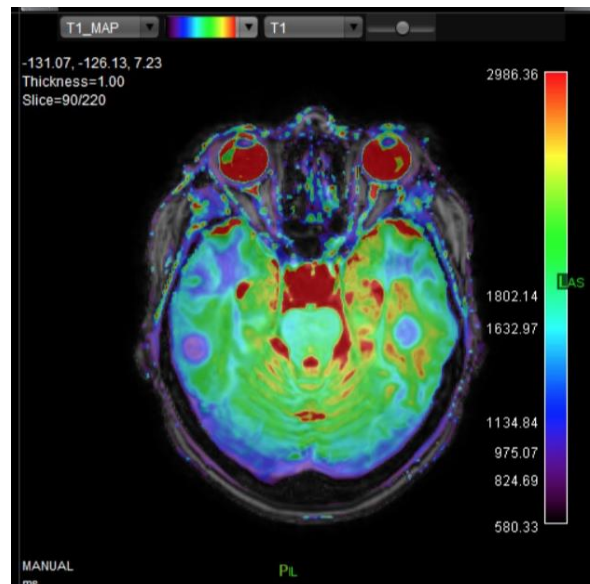

Fig. S1. **T<sub>1</sub> map following the injection of AGuIX nanoparticles.** This map corresponds to the image obtained in the patient with multiple NSCLC metastases shown in Figure 2. The uptake of the AGuIX nanoparticles into the two metastases results in decreased T<sub>1</sub> values in the tumor.
